# Supplementary material
Source: PubMed Central journal article supplement (PMC4194160)
Supplement: NIHMS611059-supplement-01.pdf [file NIHMS611059-supplement-01.pdf]

**Supplemental Table 1. Adjusted Mean Shifts in Age at Pubertal Onset (Months, 95% CIs) by Quartiles of Wet-Weight Serum OCPs Comparing Primary Wet-Weight Model with Sensitivity Analysis Additionally Adjusted for Maternal Age at Menarche in 350 Russian Boys**

|                             | G2+ (n=322)                    |         |                                |         | TV > 3 mL (n=322)              |         |                                |         |
|-----------------------------|--------------------------------|---------|--------------------------------|---------|--------------------------------|---------|--------------------------------|---------|
|                             | Primary Model <sup>a</sup>     |         | Sensitivity Model <sup>b</sup> |         | Primary Model <sup>c</sup>     |         | Sensitivity Model <sup>d</sup> |         |
|                             | Mean Shift (months) and 95% CI | p-value | Mean Shift (months) and 95% CI | p-value | Mean Shift (months) and 95% CI | p-value | Mean Shift (months) and 95% CI | p-value |
| <b>HCB<sup>e</sup></b>      |                                |         |                                |         |                                |         |                                |         |
| Q1                          | REF                            |         | REF                            |         | REF                            |         | REF                            |         |
| Q2                          | -1.83 (-8.71, 5.06)            | 0.60    | -2.54 (-9.33, 4.25)            | 0.46    | 3.01 (-3.16, 9.18)             | 0.34    | 2.33 (-3.77, 8.43)             | 0.45    |
| Q3                          | 5.69 (-1.22, 12.60)            | 0.11    | 4.34 (-2.51, 11.19)            | 0.21    | 7.84 (1.64, 14.04)             | 0.01    | 6.75 (0.59, 12.90)             | 0.03    |
| Q4                          | -2.99 (-10.01, 4.04)           | 0.40    | -3.80 (-10.73, 3.14)           | 0.28    | 4.93 (-1.32, 11.18)            | 0.12    | 4.16 (-2.01, 10.34)            | 0.19    |
| <i>p for trend</i>          |                                | 0.83    |                                | 0.96    |                                | 0.05    |                                | 0.09    |
| <b>β-HCH<sup>f</sup></b>    |                                |         |                                |         |                                |         |                                |         |
| Q1                          | REF                            |         | REF                            |         | REF                            |         | REF                            |         |
| Q2                          | 2.12 (-4.86, 9.10)             | 0.55    | 2.41 (-4.45, 9.27)             | 0.49    | -0.88 (-7.16, 5.40)            | 0.78    | -0.65 (-6.83, 5.54)            | 0.84    |
| Q3                          | 1.06 (-5.96, 8.08)             | 0.77    | -0.09 (-7.02, 6.85)            | 0.98    | 1.47 (-4.84, 7.78)             | 0.65    | 0.62 (-5.61, 6.84)             | 0.85    |
| Q4                          | 3.91 (-3.11, 10.94)            | 0.27    | 3.50 (-3.40, 10.41)            | 0.32    | 1.21 (-5.15, 7.56)             | 0.71    | 0.85 (-5.40, 7.10)             | 0.79    |
| <i>p for trend</i>          |                                | 0.35    |                                | 0.47    |                                | 0.56    |                                | 0.71    |
| <b>p,p'-DDE<sup>g</sup></b> |                                |         |                                |         |                                |         |                                |         |
| Q1                          | REF                            |         | REF                            |         | REF                            |         | REF                            |         |
| Q2                          | 2.30 (-4.65, 9.25)             | 0.51    | 1.98 (-4.87, 8.83)             | 0.57    | 1.04 (-5.21, 7.30)             | 0.74    | 0.79 (-5.36, 6.95)             | 0.80    |
| Q3                          | 1.33 (-5.65, 8.30)             | 0.71    | 1.73 (-5.14, 8.60)             | 0.62    | 1.01 (-5.27, 7.30)             | 0.75    | 1.40 (-4.78, 7.59)             | 0.66    |
| Q4                          | 5.96 (-1.30, 13.21)            | 0.11    | 5.13 (-2.03, 12.30)            | 0.16    | 3.37 (-3.20, 9.94)             | 0.31    | 2.65 (-3.82, 9.13)             | 0.42    |
| <i>p for trend</i>          |                                | 0.16    |                                | 0.20    |                                | 0.35    |                                | 0.41    |

<sup>a</sup>G2+ primary model adjusted for baseline covariates: boys' total serum lipids, birth weight, macronutrients (total caloric intake, percent calories from dietary carbohydrates, fat, and protein), blood lead levels; missing birth weight (n=1), macronutrients (n=3)

<sup>b</sup>G2+ sensitivity model adjusted for baseline covariates: boys' total serum lipids, birth weight, macronutrients (total caloric intake, percent calories from dietary carbohydrates, fat, and protein), blood lead levels, maternal age at menarche; missing birth weight (n=1), macronutrients (n=3), maternal age at menarche (n=26)

<sup>c</sup>TV > 3 mL primary model adjusted for baseline covariates: boys' total serum lipids, birth weight, macronutrients (total caloric intake, percent calories from dietary carbohydrates, fat, and protein), blood lead levels; missing birth weight (n=1), macronutrients (n=3)

<sup>d</sup>TV > 3 mL sensitivity model adjusted for baseline covariates: boys' total serum lipids, birth weight, macronutrients (total caloric intake, percent calories from dietary carbohydrates, fat, and protein), blood lead levels, maternal age at menarche; missing boy's birth weight (n=1), macronutrients (n=3), maternal age at menarche (n=26)

<sup>e</sup>HCB wet-weight quartiles (Q1-Q4, pg/g serum): Q1: 169-516; Q2: 517-751; Q3: 752-1,156; Q4: 1,157-15,482

<sup>f</sup>β-HCH wet-weight quartiles (Q1-Q4, pg/g serum): Q1: 209-567; Q2: 568-814; Q3: 815-1,294; Q4: 1,295-13,732

<sup>g</sup>p,p'-DDE wet-weight quartiles (Q1-Q4, pg/g serum): Q1: 261-907; Q2: 908-1,406; Q3: 1,407-2,327; Q4: 2,328-41,301

**Supplemental Table 2. Adjusted Mean Shifts of Age at Pubertal Onset (Months, 95% CIs) Comparing Primary Wet-Weight Model with Alternative Analysis using Lipid-Normalized Measures in 350 Russian Boys**

|                            | G2+ (n=346)                    |         |                                     |         | TV > 3 mL (n=346)              |         |                                     |         | P2+ (n=344)                    |         |                                     |         |
|----------------------------|--------------------------------|---------|-------------------------------------|---------|--------------------------------|---------|-------------------------------------|---------|--------------------------------|---------|-------------------------------------|---------|
|                            | Wet-Weight Model <sup>a</sup>  |         | Lipid-Normalized Model <sup>b</sup> |         | Wet-Weight Model <sup>c</sup>  |         | Lipid-Normalized Model <sup>d</sup> |         | Wet-Weight Model <sup>e</sup>  |         | Lipid-Normalized Model <sup>f</sup> |         |
|                            | Mean Shift (months) and 95% CI | p-value | Mean Shift (months) and 95% CI      | p-value | Mean Shift (months) and 95% CI | p-value | Mean Shift (months) and 95% CI      | p-value | Mean Shift (months) and 95% CI | p-value | Mean Shift (months) and 95% CI      | p-value |
| <b>HCB<sup>g,h</sup></b>   |                                |         |                                     |         |                                |         |                                     |         |                                |         |                                     |         |
| Q1                         | REF                            |         | REF                                 |         | REF                            |         | REF                                 |         | REF                            |         | REF                                 |         |
| Q2                         | -0.68 (-7.45, 6.08)            | 0.84    | 1.61 (-5.18, 8.41)                  | 0.64    | 3.56 (-2.57, 9.70)             | 0.25    | 4.10 (-2.01, 10.21)                 | 0.19    | -0.08 (-5.77, 5.60)            | 0.82    | 2.80 (-2.81, 8.40)                  | 0.33    |
| Q3                         | 6.11 (-0.66, 12.88)            | 0.08    | 5.58 (-1.29, 12.45)                 | 0.11    | 7.87 (1.73, 14.02)             | 0.01    | 6.82 (0.67, 12.98)                  | 0.03    | 4.65 (-1.04, 10.34)            | 0.11    | 8.97 (3.33, 14.60)                  | 0.002   |
| Q4                         | -2.72 (-9.55, 4.10)            | 0.43    | 0.72 (-6.22, 7.66)                  | 0.84    | 4.73 (-1.42, 10.88)            | 0.13    | 7.03 (0.82, 13.24)                  | 0.03    | 4.59 (-1.13, 10.31)            | 0.12    | 5.20 (-0.50, 10.89)                 | 0.07    |
| <i>p for trend</i>         |                                | 0.93    |                                     | 0.57    |                                | 0.06    |                                     | 0.02    |                                | 0.04    |                                     | 0.02    |
| <b>β-HCH<sup>i,j</sup></b> |                                |         |                                     |         |                                |         |                                     |         |                                |         |                                     |         |
| Q1                         | REF                            |         | REF                                 |         | REF                            |         | REF                                 |         | REF                            |         | REF                                 |         |
| Q2                         | 2.64 (-4.20, 9.47)             | 0.45    | -0.07 (-6.93, 6.78)                 | 0.98    | -0.05 (-6.29, 6.19)            | 0.99    | 2.55 (-3.64, 8.74)                  | 0.42    | -1.69 (-7.47, 4.09)            | 0.57    | 3.15 (-2.62, 8.92)                  | 0.28    |
| Q3                         | 1.91 (-4.88, 8.69)             | 0.58    | 2.36 (-4.48, 9.20)                  | 0.50    | 1.79 (-4.38, 7.96)             | 0.57    | -0.25 (-6.42, 5.92)                 | 0.94    | 3.43 (-2.33, 9.19)             | 0.24    | 3.86 (-1.89, 9.60)                  | 0.19    |
| Q4                         | 4.07 (-2.78, 10.92)            | 0.24    | 2.38 (-4.51, 9.26)                  | 0.50    | 1.35 (-4.91, 7.62)             | 0.67    | 2.16 (-4.09, 8.41)                  | 0.50    | -1.33 (-7.18, 4.51)            | 0.65    | 0.28 (-5.55, 6.12)                  | 0.92    |
| <i>p for trend</i>         |                                | 0.30    |                                     | 0.39    |                                | 0.56    |                                     | 0.72    |                                | 0.91    |                                     | 0.86    |
| <b>DDE<sup>k,l</sup></b>   |                                |         |                                     |         |                                |         |                                     |         |                                |         |                                     |         |
| Q1                         | REF                            |         | REF                                 |         | REF                            |         | REF                                 |         | REF                            |         | REF                                 |         |
| Q2                         | -0.08 (-6.82, 6.66)            | 0.98    | 0.86 (-5.84, 7.56)                  | 0.80    | -0.19 (-6.32, 5.95)            | 0.95    | -0.17 (-6.28, 5.93)                 | 0.96    | 3.85 (-1.88, 9.58)             | 0.19    | 2.68 (-3.06, 8.41)                  | 0.36    |
| Q3                         | -0.20 (-6.96, 6.55)            | 0.95    | -1.29 (-8.05, 5.46)                 | 0.71    | -0.44 (-6.61, 5.73)            | 0.89    | -1.97 (-8.13, 4.19)                 | 0.53    | 3.99 (-1.74, 9.72)             | 0.17    | 2.00 (-3.72, 7.73)                  | 0.49    |
| Q4                         | 4.89 (-2.05, 11.83)            | 0.17    | 6.54 (-0.33, 13.41)                 | 0.06    | 3.31 (-3.05, 9.66)             | 0.31    | 3.68 (-2.61, 9.98)                  | 0.25    | 3.33 (-2.55, 9.21)             | 0.27    | 2.56 (-3.32, 8.45)                  | 0.39    |
| <i>p for trend</i>         |                                | 0.20    |                                     | 0.12    |                                | 0.36    |                                     | 0.38    |                                | 0.28    |                                     | 0.45    |

<sup>a</sup>G2+ wet-weight model adjusted for baseline covariates: boys' total serum lipids, birth weight, macronutrients (total caloric intake, percent calories from dietary carbohydrates, fat, and protein), blood lead levels; missing birth weight (n=1), macronutrients (n=3)

<sup>b</sup>G2+ lipid-normalized model adjusted for baseline covariates: boys' birth weight, macronutrients (total caloric intake, percent calories from dietary carbohydrates, fat, and protein), blood lead levels; missing birth weight (n=1), macronutrients (n=3)

<sup>c</sup>TV > 3 mL wet-weight model adjusted for baseline covariates: boys' total serum lipids, birth weight, macronutrients (total caloric intake, percent calories from dietary carbohydrates, fat, and protein), blood lead levels; missing birth weight (n=1), macronutrients (n=3)

<sup>d</sup>TV > 3 mL lipid-normalized model adjusted for baseline covariates: boys' birth weight, macronutrients (total caloric intake, percent calories from dietary carbohydrates, fat, and protein), blood lead levels; missing birth weight (n=1), macronutrients (n=3)

<sup>e</sup>P2+ wet-weight model adjusted for baseline covariates: boys' total serum lipids, macronutrients (total caloric intake, percent calories from dietary carbohydrates, fat, and protein), blood lead levels, maternal age at birth, household income; missing macronutrients (n=3), household income (n=1), maternal age at birth (n=2)

<sup>f</sup>P2+ lipid-normalized model adjusted for baseline covariates: boys' macronutrients (total caloric intake, percent calories from dietary carbohydrates, fat, and protein), blood lead levels, maternal age at birth, household income; missing macronutrients (n=3), household income (n=1), maternal at birth (n=2)

<sup>g</sup>HCB wet-weight quartiles (Q1-Q4, pg/g serum): Q1: 169-516; Q2: 517-751; Q3: 752-1,156; Q4: 1,157-15,482

<sup>h</sup>HCB lipid-normalized quartiles (Q1-Q4, ng/g lipid): Q1: 31-105; Q2: 106-158; Q3: 159-246; Q4: 247-2,660

<sup>i</sup>β-HCH wet-weight quartiles (Q1-Q4, pg/g serum): Q1: 209-567; Q2: 568-814; Q3: 815-1,294; Q4: 1,295-13,732

<sup>j</sup>β-HCH lipid-normalized quartiles (Q1-Q4, ng/g lipid): Q1: 39-115; Q2: 116-168; Q3: 169-269; Q4: 270-2,860

1<sup>k</sup>*p,p'*-DDE wet-weight quartiles (Q1-Q4, pg/g serum): Q1: 261-907; Q2: 908-1,406; Q3: 1,407-2,327; Q4: 2,328-41,301

2<sup>k</sup>*p,p'*-DDE lipid-normalized quartiles (Q1-Q4, ng/g lipid): Q1: 48-189; Q2: 190-292; Q3: 293-493; Q4: 494-9,370

3  
4  
5  
6  
7  
8  
9  
10  
11  
12  
13  
14  
15  
16  
17  
18  
19  
20  
21  
22  
23  
24  
25  
26  
27  
28  
29  
30  
31  
32  
33  
34  
35  
36  
37  
38  
39  
40  
41  
42  
43  
44  
45  
46  
47  
48  
49

**Supplemental Table 3. Adjusted Mean Shifts in Age at Pubertal Onset (Months, 95% CIs) by Quartiles of Lipid-Normalized Serum OCPs Comparing Lipid-Normalized Model with Sensitivity Analysis Additionally Adjusted for Baseline BMI Categories and Height Z-scores in 350 Russian Boys**

|                             | G2+ (n=346)                         |         |                                |         | TV > 3 mL (n=346)                   |         |                                |         | P2+ (n=344)                         |         |                                |         |
|-----------------------------|-------------------------------------|---------|--------------------------------|---------|-------------------------------------|---------|--------------------------------|---------|-------------------------------------|---------|--------------------------------|---------|
|                             | Lipid-Normalized Model <sup>a</sup> |         | Sensitivity Model <sup>b</sup> |         | Lipid-Normalized Model <sup>c</sup> |         | Sensitivity Model <sup>d</sup> |         | Lipid-Normalized Model <sup>e</sup> |         | Sensitivity Model <sup>f</sup> |         |
|                             | Mean Shift (months) and 95% CI      | p-value | Mean Shift (months) and 95% CI | p-value | Mean Shift (months) and 95% CI      | p-value | Mean Shift (months) and 95% CI | p-value | Mean Shift (months) and 95% CI      | p-value | Mean Shift (months) and 95% CI | p-value |
| <b>HCB<sup>g</sup></b>      |                                     |         |                                |         |                                     |         |                                |         |                                     |         |                                |         |
| Q1                          | REF                                 |         | REF                            |         | REF                                 |         | REF                            |         | REF                                 |         | REF                            |         |
| Q2                          | 1.61 (-5.18, 8.41)                  | 0.64    | 0.76 (-5.72, 7.25)             | 0.82    | 4.10 (-2.01, 10.21)                 | 0.19    | 3.20 (-2.80, 9.20)             | 0.30    | 2.80 (-2.81, 8.40)                  | 0.33    | 1.88 (-3.71, 7.48)             | 0.51    |
| Q3                          | 5.58 (-1.29, 12.45)                 | 0.11    | 3.40 (-3.44, 10.24)            | 0.33    | 6.82 (0.67, 12.98)                  | 0.03    | 5.38 (-0.92, 11.69)            | 0.09    | 8.97 (3.33, 14.60)                  | 0.002   | 7.24 (1.35, 13.13)             | 0.02    |
| Q4                          | 0.72 (-6.22, 7.66)                  | 0.84    | -0.97 (-7.78, 5.83)            | 0.78    | 7.03 (0.82, 13.24)                  | 0.03    | 5.70 (-0.56, 11.95)            | 0.07    | 5.20 (-0.50, 10.89)                 | 0.07    | 3.54 (-2.33, 9.41)             | 0.24    |
| <i>p for trend</i>          |                                     | 0.57    |                                | 0.93    |                                     | 0.02    |                                | 0.06    |                                     | 0.02    |                                | 0.11    |
| <b>β-HCH<sup>h</sup></b>    |                                     |         |                                |         |                                     |         |                                |         |                                     |         |                                |         |
| Q1                          | REF                                 |         | REF                            |         | REF                                 |         | REF                            |         | REF                                 |         | REF                            |         |
| Q2                          | -0.07 (-6.93, 6.78)                 | 0.98    | 0.12 (-6.44, 6.68)             | 0.97    | 2.55 (-3.64, 8.74)                  | 0.42    | 1.92 (-4.16, 8.00)             | 0.54    | 3.15 (-2.62, 8.92)                  | 0.28    | 2.01 (-3.78, 7.79)             | 0.50    |
| Q3                          | 2.36 (-4.48, 9.20)                  | 0.50    | 1.04 (-5.81, 7.89)             | 0.77    | -0.25 (-6.42, 5.92)                 | 0.94    | -2.38 (-8.73, 3.98)            | 0.46    | 3.86 (-1.89, 9.60)                  | 0.19    | 1.59 (-4.43, 7.61)             | 0.60    |
| Q4                          | 2.31 (-4.51, 9.26)                  | 0.50    | -0.20 (-7.14, 6.73)            | 0.95    | 2.16 (-4.09, 8.41)                  | 0.50    | -0.81 (-7.28, 5.67)            | 0.81    | 0.28 (-5.55, 6.12)                  | 0.92    | -3.38 (-9.57, 2.82)            | 0.29    |
| <i>p for trend</i>          |                                     | 0.39    |                                | 0.99    |                                     | 0.72    |                                | 0.54    |                                     | 0.86    |                                | 0.27    |
| <b>p,p'-DDE<sup>i</sup></b> |                                     |         |                                |         |                                     |         |                                |         |                                     |         |                                |         |
| Q1                          | REF                                 |         | REF                            |         | REF                                 |         | REF                            |         | REF                                 |         | REF                            |         |
| Q2                          | 0.86 (-5.84, 7.56)                  | 0.80    | 0.13 (-6.54, 6.80)             | 0.97    | -0.17 (-6.28, 5.93)                 | 0.96    | -1.67 (-7.87, 4.53)            | 0.60    | 2.68 (-3.06, 8.41)                  | 0.36    | 1.31 (-4.53, 7.15)             | 0.66    |
| Q3                          | -1.29 (-8.05, 5.46)                 | 0.71    | -1.72 (-8.47, 5.02)            | 0.71    | -1.97 (-8.13, 4.19)                 | 0.53    | -3.59 (-9.87, 2.70)            | 0.26    | 2.00 (-3.72, 7.73)                  | 0.49    | 0.67 (-5.20, 6.54)             | 0.82    |
| Q4                          | 6.54 (-0.33, 13.41)                 | 0.06    | 2.09 (-4.98, 9.16)             | 0.56    | 3.68 (-2.61, 9.98)                  | 0.25    | -0.82 (-7.43, 5.80)            | 0.81    | 2.56 (-3.32, 8.45)                  | 0.39    | -0.90 (-7.06, 5.26)            | 0.78    |
| <i>p for trend</i>          |                                     | 0.12    |                                | 0.70    |                                     | 0.38    |                                | 0.68    |                                     | 0.45    |                                | 0.73    |

<sup>a</sup>G2+ lipid-normalized model adjusted for baseline covariates: boys' birth weight, macronutrients (total caloric intake, percent calories from dietary carbohydrates, fat, and protein),

<sup>b</sup>blood lead levels; missing birth weight (n=1), macronutrients (n=3)

<sup>b</sup>G2+ sensitivity model adjusted for baseline covariates: boys' birth weight, macronutrients (total caloric intake, percent calories from dietary carbohydrates, fat, and protein), blood lead levels, WHO BMI z-score, WHO height z-score; missing birth weight (n=1), macronutrients (n=3)

<sup>c</sup>TV > 3 mL lipid-normalized model adjusted for baseline covariates: boys' birth weight, macronutrients (total caloric intake, percent calories from dietary carbohydrates, fat, and protein), blood lead levels; missing birth weight (n=1), macronutrients (n=3)

<sup>d</sup>TV > 3 mL sensitivity model adjusted for baseline covariates: boys' birth weight, macronutrients (total caloric intake, percent calories from dietary carbohydrates, fat, and protein), blood lead levels, WHO BMI z-score, WHO height z-score; missing birth weight (n=1), macronutrients (n=3)

<sup>e</sup>P2+ lipid-normalized model adjusted for baseline covariates: boys' macronutrients (total caloric intake, percent calories from dietary carbohydrates, fat, and protein), blood lead levels, maternal age at birth, household income; missing macronutrients (n=3), household income (n=1), maternal age at birth (n=2)

<sup>f</sup>P2+ sensitivity model adjusted for baseline covariates: boys' macronutrients (total caloric intake, percent calories from dietary carbohydrates, fat, and protein), blood lead levels, maternal age at birth, household income, WHO BMI z-score, WHO height z-score; missing macronutrients (n=3), household income (n=1), maternal age at birth (n=2)

<sup>g</sup>HCB lipid-normalized quartiles (Q1-Q4, ng/g lipid): Q1: 31-105; Q2: 106-158; Q3: 159-246; Q4: 247-2,660

<sup>h</sup>β-HCH lipid-normalized quartiles (Q1-Q4, ng/g lipid): Q1: 39-115; Q2: 116.-168; Q3: 169-269; Q4: 270-2,860

<sup>i</sup>p,p'-DDE lipid-normalized quartiles (Q1-Q4, ng/g lipid): Q1: 48-189; Q2: 190-292; Q3: 293-493; Q4: 494-9,370

**Supplemental Table 4. Adjusted Mean Shifts in Age at Pubertal Onset (Months, 95% CIs) by Quartiles of Lipid-Normalized Serum OCPs Comparing Lipid-Normalized Model with Sensitivity Analysis Additionally Adjusted for Maternal Age at Menarche in 350 Russian Boys**

|                                             | G2+ (n=322)                         |         |                                |         | TV > 3 mL (n=322)                   |         |                                |         |
|---------------------------------------------|-------------------------------------|---------|--------------------------------|---------|-------------------------------------|---------|--------------------------------|---------|
|                                             | Lipid-Normalized Model <sup>a</sup> |         | Sensitivity Model <sup>b</sup> |         | Lipid-Normalized Model <sup>c</sup> |         | Sensitivity Model <sup>d</sup> |         |
|                                             | Mean Shift (months) and 95% CI      | p-value | Mean Shift (months) and 95% CI | p-value | Mean Shift (months) and 95% CI      | p-value | Mean Shift (months) and 95% CI | p-value |
| <sup>9</sup> HCB <sup>e</sup>               |                                     |         |                                |         |                                     |         |                                |         |
| Q1                                          | REF                                 |         | REF                            |         | REF                                 |         | REF                            |         |
| Q2                                          | 0.71 (-6.21, 7.63)                  | 0.84    | -0.13 (-6.95, 6.70)            | 0.97    | 4.20 (-1.95, 10.35)                 | 0.18    | 3.45 (-2.63, 9.52)             | 0.27    |
| Q3                                          | 4.54 (-2.52, 11.61)                 | 0.21    | 3.52 (-3.46, 10.50)            | 0.32    | 6.50 (0.25, 12.76)                  | 0.04    | 5.72 (-0.46, 11.91)            | 0.07    |
| Q4                                          | 0.66 (-6.52, 7.85)                  | 0.86    | -0.37 (-7.47, 6.72)            | 0.92    | 7.68 (1.34, 14.02)                  | 0.02    | 6.74 (0.46, 13.02)             | 0.04    |
| <i>p for trend</i>                          |                                     | 0.59    |                                | 0.80    |                                     | 0.01    |                                | 0.03    |
| <sup>15</sup> β-HCH <sup>f</sup>            |                                     |         |                                |         |                                     |         |                                |         |
| Q1                                          | REF                                 |         | REF                            |         | REF                                 |         | REF                            |         |
| Q2                                          | -0.50 (-7.48, 6.48)                 | 0.89    | 0.18 (-6.70, 7.06)             | 0.96    | 1.10 (-5.14, 7.33)                  | 0.73    | 1.78 (-4.36, 7.91)             | 0.57    |
| Q3                                          | 2.38 (-4.63, 9.39)                  | 0.51    | 1.94 (-4.95, 8.84)             | 0.58    | -0.37 (-6.63, 5.89)                 | 0.91    | -0.66 (-6.80, 5.49)            | 0.83    |
| Q4                                          | 1.93 (-5.13, 8.99)                  | 0.59    | 1.60 (-5.34, 8.55)             | 0.65    | 1.46 (-4.89, 7.81)                  | 0.65    | 1.18 (-5.05, 7.41)             | 0.71    |
| <i>p for trend</i>                          |                                     | 0.45    |                                | 0.56    |                                     | 0.78    |                                | 0.91    |
| <sup>21</sup> <i>p,p'</i> -DDE <sup>g</sup> |                                     |         |                                |         |                                     |         |                                |         |
| Q1                                          | REF                                 |         | REF                            |         | REF                                 |         | REF                            |         |
| Q2                                          | 1.27 (-5.67, 8.22)                  | 0.72    | 1.98 (-4.89, 8.85)             | 0.57    | -0.80 (-7.06, 5.46)                 | 0.80    | -0.09 (-6.27, 6.09)            | 0.98    |
| Q3                                          | -0.25 (-7.14, 6.64)                 | 0.94    | 0.55 (-6.26, 7.36)             | 0.87    | -0.85 (-7.07, 5.36)                 | 0.79    | -0.09 (-6.23, 6.05)            | 0.98    |
| Q4                                          | 6.91 (-0.24, 14.05)                 | 0.06    | 6.36 (-0.69, 13.41)            | 0.08    | 3.11 (-3.36, 9.58)                  | 0.35    | 2.66 (-3.71, 9.04)             | 0.41    |
| <i>p for trend</i>                          |                                     | 0.11    |                                | 0.13    |                                     | 0.40    |                                | 0.46    |

<sup>28</sup>G2+ lipid-normalized model adjusted for baseline covariates: boys' birth weight, macronutrients (total caloric intake, percent calories from dietary carbohydrates, fat, and protein),

<sup>29</sup>blood lead levels; missing birth weight (n=1), macronutrients (n=3)

<sup>30</sup>G2+ sensitivity model adjusted for baseline covariates: boys' birth weight, macronutrients (total caloric intake, percent calories from dietary carbohydrates, fat, and protein), blood lead levels, maternal age at menarche; missing birth weight (n=1), macronutrients (n=3), maternal age at menarche (n=26)

<sup>32</sup>TV > 3 mL lipid-normalized model adjusted for baseline covariates: boys' birth weight, macronutrients (total caloric intake, percent calories from dietary carbohydrates, fat, and protein), blood lead levels; missing birth weight (n=1), macronutrients (n=3)

<sup>34</sup>TV > 3 mL sensitivity model adjusted for baseline covariates: boys' birth weight, macronutrients (total caloric intake, percent calories from dietary carbohydrates, fat, and protein), blood lead levels, maternal age at menarche; missing birth weight (n=1), macronutrients (n=3), maternal age at menarche (n=26)

<sup>37</sup>HCB lipid-normalized quartiles (Q1-Q4, ng/g lipid): Q1: 31-105; Q2: 106-158; Q3: 159-246; Q4: 247-2,660

<sup>38</sup>β-HCH lipid-normalized quartiles (Q1-Q4, ng/g lipid): Q1: 39-115; Q2: 116.-168; Q3: 169-269; Q4: 270-2,860

<sup>39</sup>*p,p'*-DDE lipid-normalized quartiles (Q1-Q4, ng/g lipid): Q1: 48-189; Q2: 190-292; Q3: 293-493; Q4: 494-9,370

41  
42  
43  
44  
45  
46  
47  
48  
49

Supplemental Figure 1. Adjusted Mean Shifts in Age at Pubertal Onset (Months, 95% CIs) by Quartiles of Lipid-Normalized OCPs<sup>a,b,c</sup>

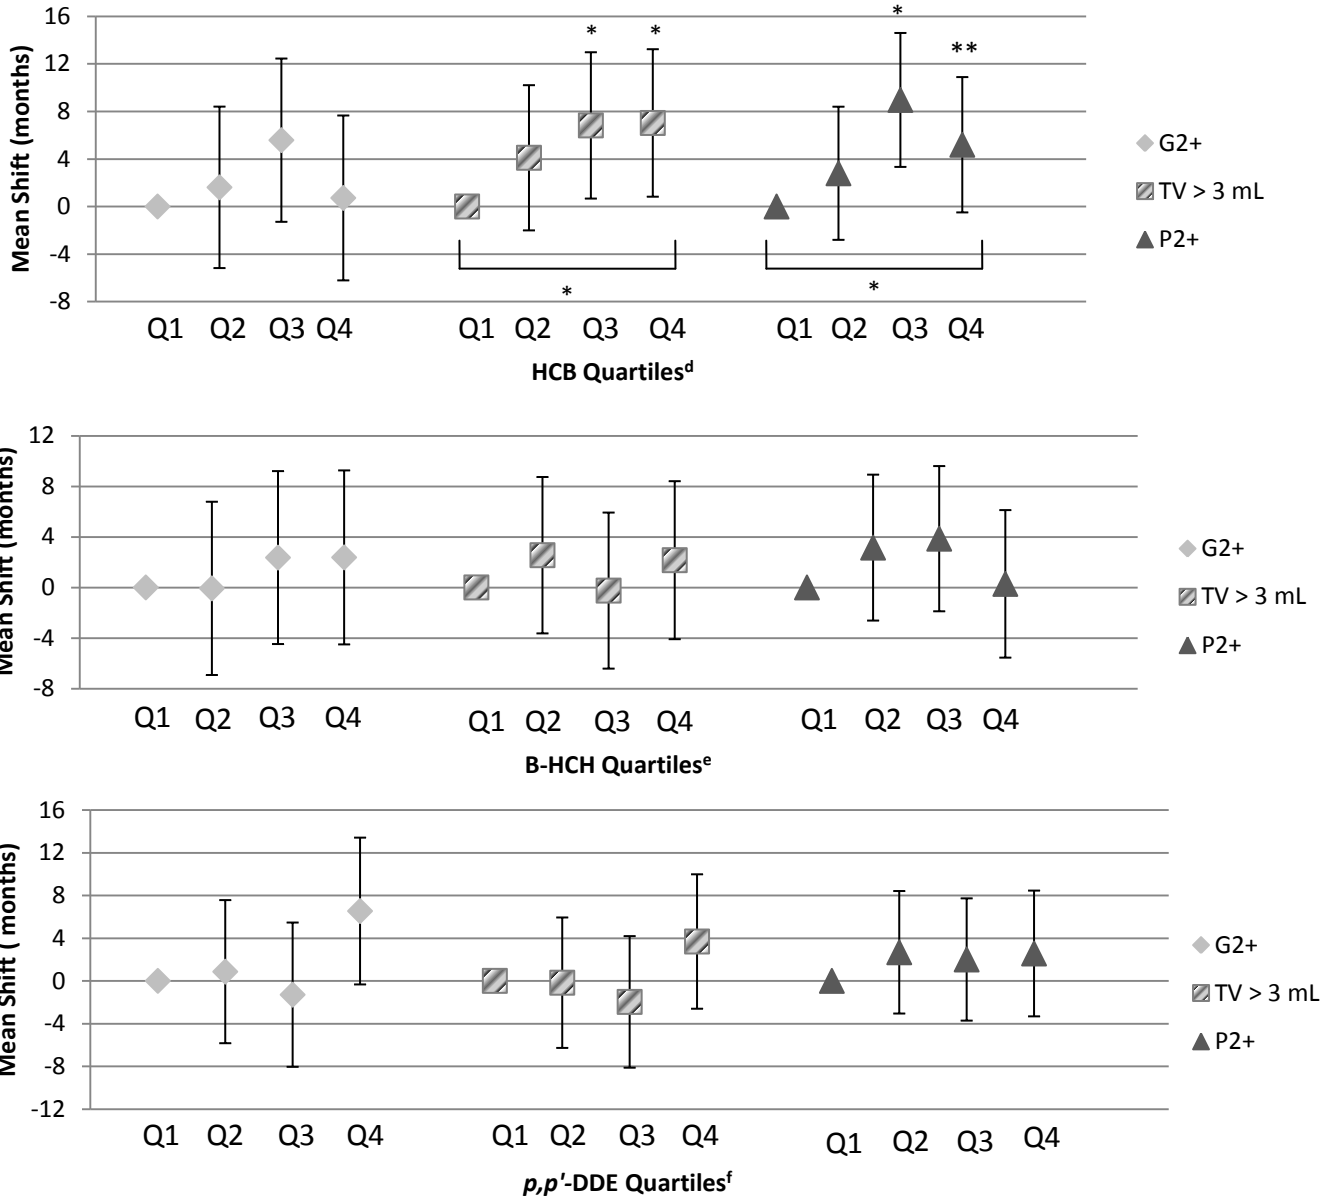

\*p ≤ 0.05

\*\*p ≤ 0.10

Shift in months is relative to Q1 (reference)

<sup>a</sup>G2+ lipid-normalized model adjusted for baseline covariates: boys' birth weight, macronutrients (total caloric intake, percent calories from dietary carbohydrates, fat, and protein), blood lead levels; missing birth weight (n=1), macronutrients (n=3)

<sup>b</sup>TV > 3 mL lipid-normalized model adjusted for baseline covariates: boys' birth weight, macronutrients (total caloric intake, percent calories from dietary carbohydrates, fat, and protein), blood lead levels; missing birth weight (n=1), macronutrients (n=3)

<sup>c</sup>P2+ lipid-normalized model adjusted for baseline covariates: boys' macronutrients (total caloric intake, percent calories from dietary carbohydrates, fat, and protein), blood lead levels, maternal age at birth, household income; missing macronutrients (n=3), household income (n=1), maternal age at birth (n=2)

<sup>d</sup>HCB lipid-normalized quartiles (Q1-Q4, ng/g lipid): Q1: 31-105; Q2: 106-158; Q3: 159-246; Q4: 247-2,660

<sup>e</sup>β-HCH lipid-normalized quartiles (Q1-Q4, ng/g lipid): Q1: 39-115; Q2: 116.-168; Q3: 169-269; Q4: 270-2,860

<sup>f</sup>p,p'-DDE lipid-normalized quartiles (Q1-Q4, ng/g lipid): Q1: 48-189; Q2: 190-292; Q3: 293-493; Q4: 494-9,370

Supplemental Figure 2. Adjusted Mean Shifts in Age at Pubertal Onset (Months, 95% CIs) by Wet-Weight and Lipid-Normalized HCB Concentrations<sup>a,b,c,d,e,f</sup>

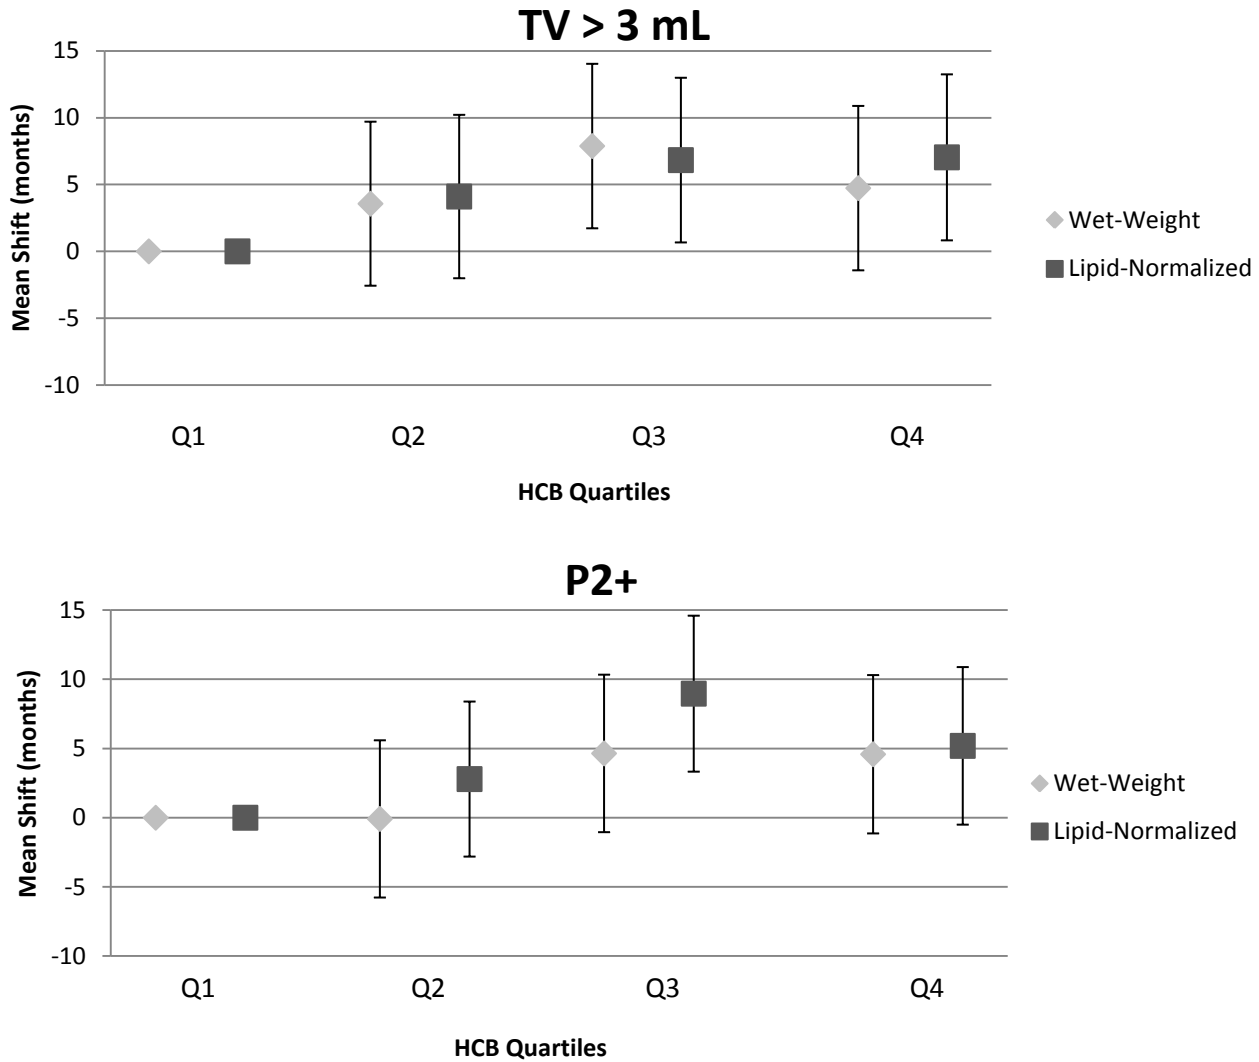

Shift in months is relative to Q1 (reference)

<sup>a</sup> TV > 3 wet-weight model adjusted for baseline covariates: boys' total serum lipids, birth weight, macronutrients (total caloric intake, percent calories from dietary carbohydrates, fat, and protein), blood lead levels; missing birth weight (n=1), macronutrients (n=3)

<sup>b</sup> TV > 3 mL lipid-normalized model adjusted for baseline covariates: boys' birth weight, macronutrients (total caloric intake, percent calories from dietary carbohydrates, fat, and protein), blood lead levels; missing birth weight (n=1), macronutrients (n=3)

<sup>c</sup> P2+ wet-weight model adjusted for baseline covariates: boys' total serum lipids, macronutrients (total caloric intake, percent calories from dietary carbohydrates, fat, and protein), blood lead levels, maternal age at birth, household income; missing macronutrients (n=3), household income (n=1), maternal age at birth (n=2)

<sup>d</sup> P2+ lipid-normalized model adjusted for baseline covariates: boys' macronutrients (total caloric intake, percent calories from dietary carbohydrates, fat, and protein), blood lead levels, maternal age at birth, household income; missing macronutrients (n=3), household income (n=1), maternal age at birth (n=2)

<sup>e</sup> HCB wet-weight quartiles (Q1-Q4, pg/g serum): Q1: 169-516; Q2: 517-751; Q3: 752-1,156; Q4: 1,157-15,482

<sup>f</sup> HCB lipid-normalized quartiles (Q1-Q4, ng/g lipid): Q1: 31-105; Q2: 106-158; Q3: 159-246; Q4: 247-2,660
